# Supplementary material for: A simple approach for preparation of porous polybenzimidazole membranes as a promising separator for lithium ion batteries
Source: Royal Society of Chemistry journal article supplement (doi:10.1039/c7ta03554c), 2017-01-01
Supplement: c7ta03554c1.pdf [file c7ta03554c1.pdf]

## Supporting Information

### A Facile Approach for Preparation of Porous Polybenzimidazole Membranes as a Promising Separator for Lithium Ion Batteries

Naiqiang Liang<sup>a</sup>, Jianhua Fang<sup>a</sup>, Xiaoxia Guo<sup>a\*</sup>

<sup>a</sup>: Shanghai Electrochemical Energy Devices Research Center, School of Chemistry and Chemical Engineering, Shanghai Jiao Tong University, 800 Dongchuan Road, Shanghai 200240, China.

\*E-mail: xxguo@sjtu.edu.cn

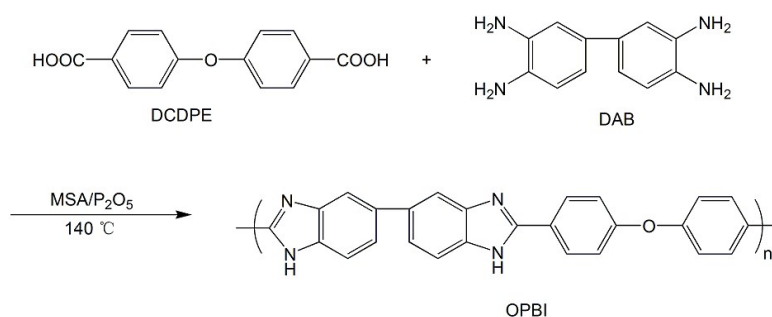

**Scheme S1** The process for synthesis of OPBI polymer.

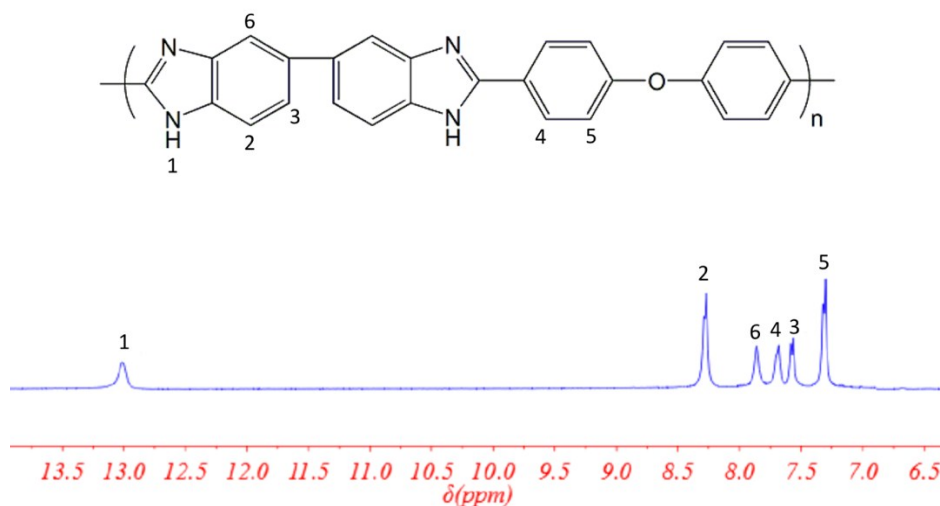

**Fig. S1** The <sup>1</sup>H NMR of the synthesized OPBI polymer.

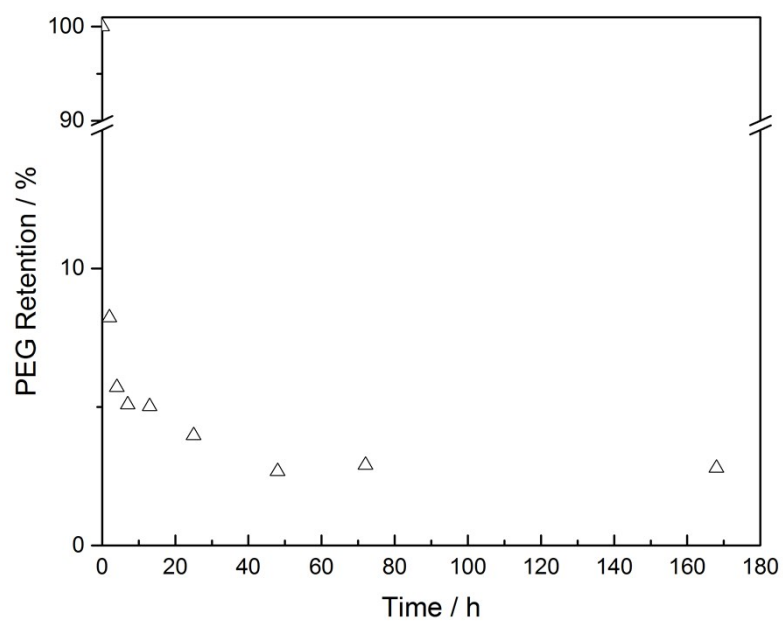

**Fig. S2** PEG retention percentage of OPBI/PEG1000 blend membrane(weight ratio: 1:5) at different water washed time. (60 °C, Change water by every 6h.)

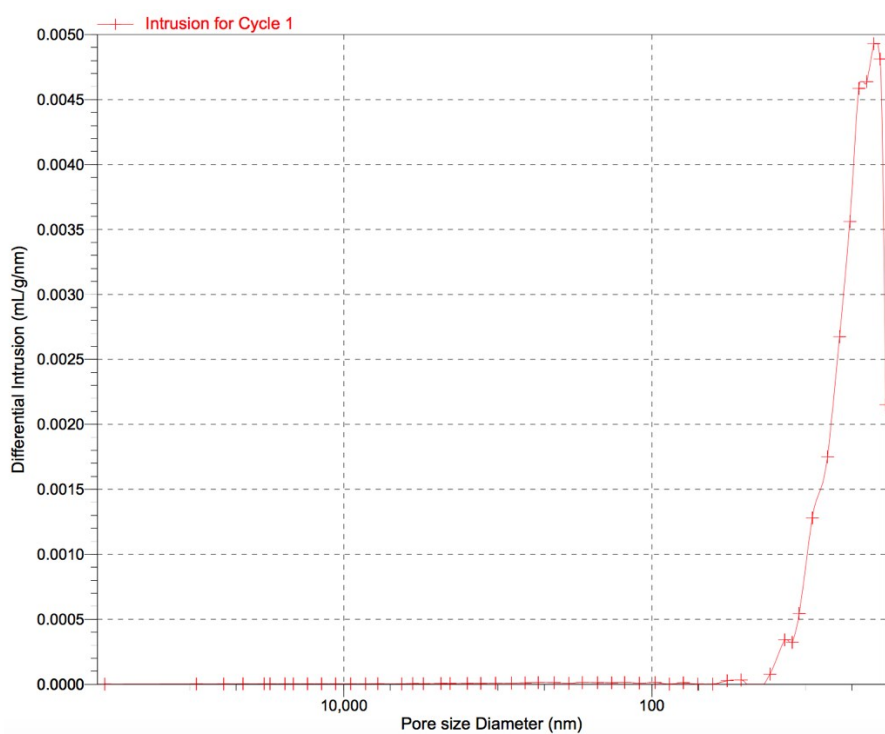

**Fig. S3** The intrusive mercury measurement result (Differential Intrusion vs Pore size) of M-1

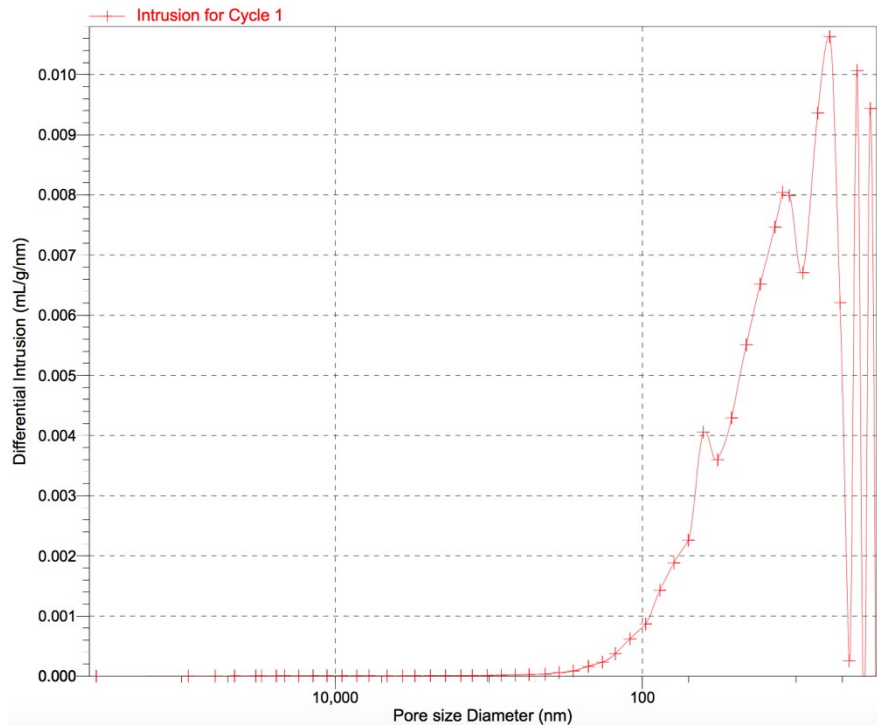

**Fig. S4** The intrusive mercury measurement result (Differential Intrusion vs Pore size) of M-2

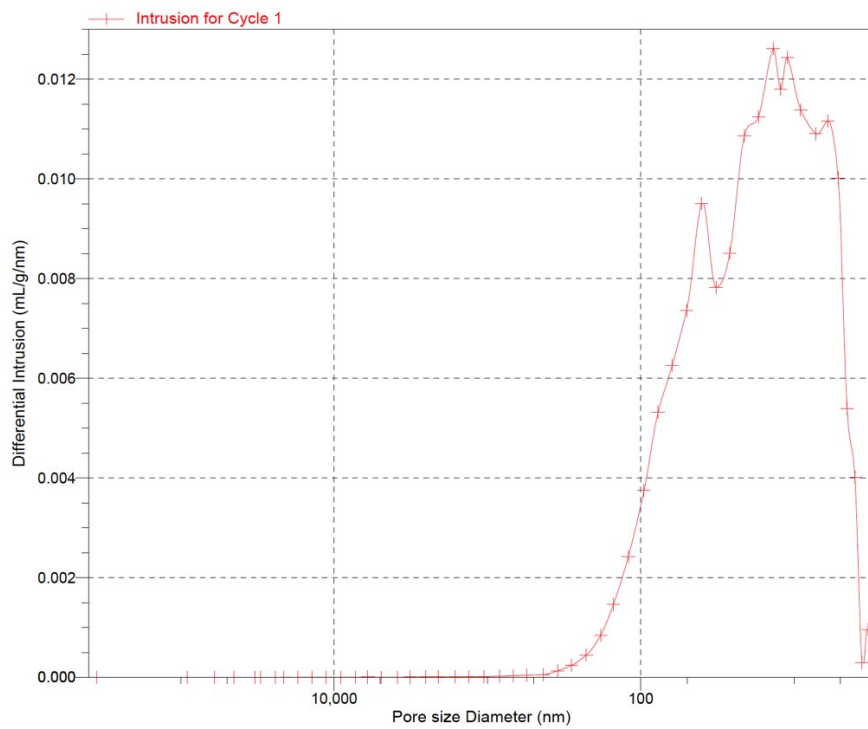

**Fig. S5** The intrusive mercury measurement result (Differential Intrusion vs Pore size) of M-3

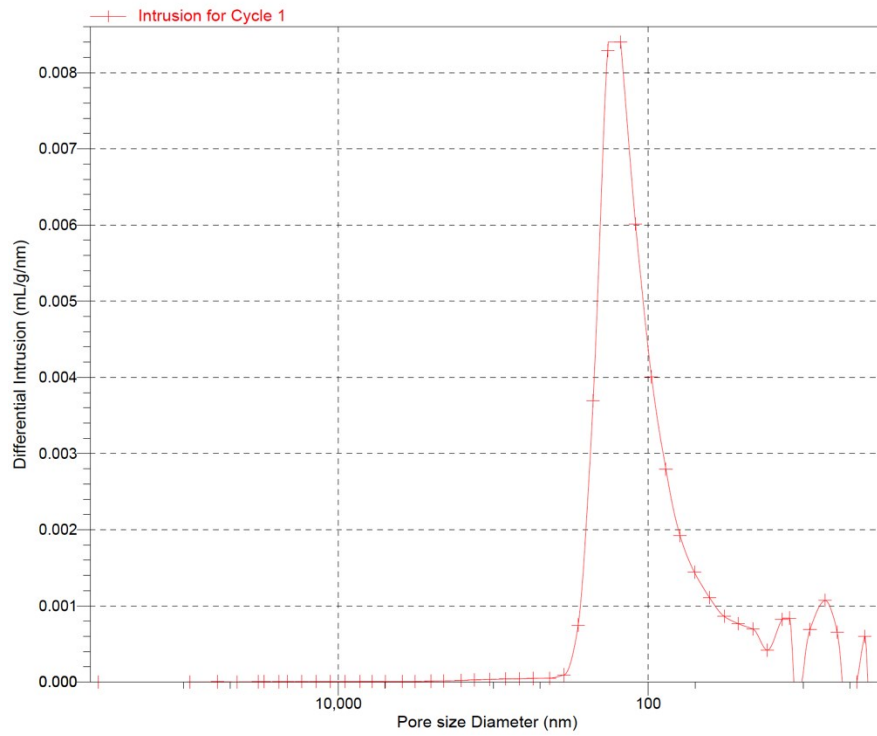

**Fig. S6** The intrusive mercury measurement result (Differential Intrusion vs Pore size) of M-4

**Table S1** The intrusive mercury measurements results (average pore diameter and porosity) for M-3 and M-4

| Membrane | Average Pore Diameter (4V/A) | Porosity |
|----------|------------------------------|----------|
| M-1      | 40.9 nm                      | 47%      |
| M-2      | 47.1 nm                      | 60%      |
| M-3      | 53.7 nm                      | 67%      |
| M-4      | 255.2 nm                     | 72%      |

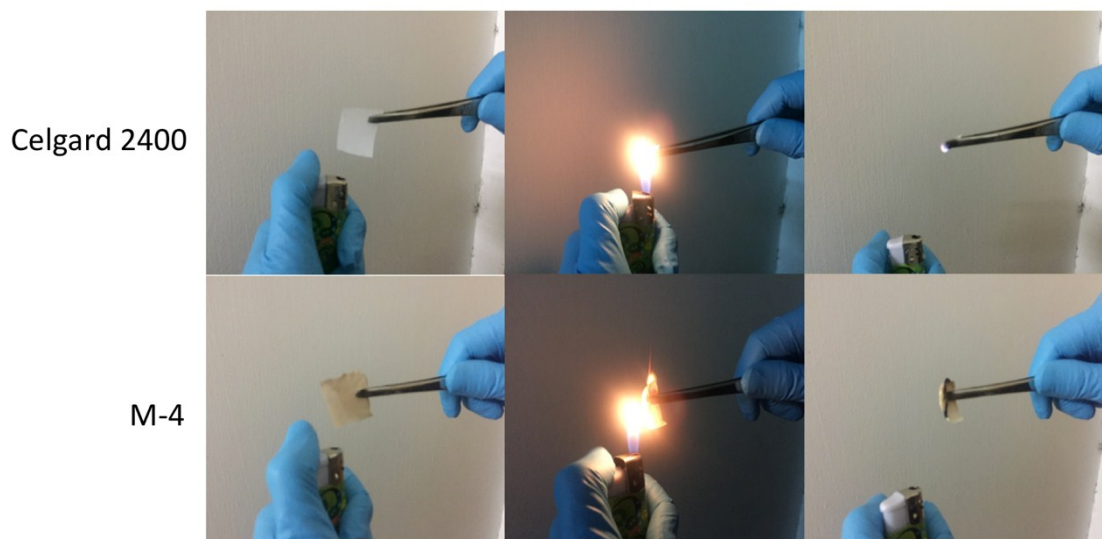

**Fig. S7** The combustion test of Celgard2400 and M-4

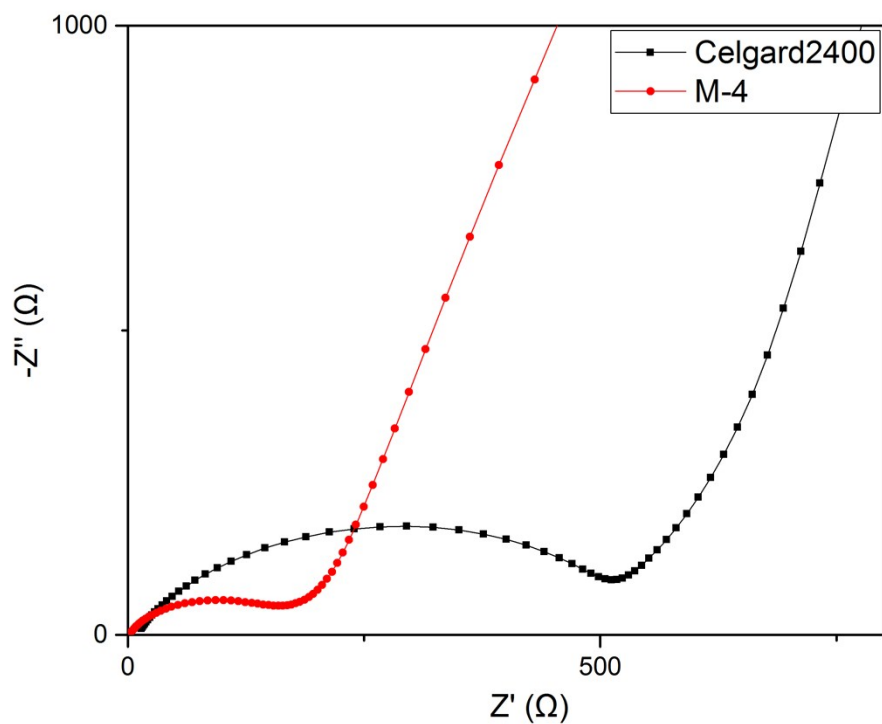

**Fig. S8** Electrochemical impedance spectra of Li/M-4 (27  $\mu\text{m}$ )/Li and Li/Celgard2400 (25  $\mu\text{m}$ )/Li symmetric cells at 25 °C.
